# Supplementary material for: The effects of school closures on SARS-CoV-2 among parents and teachers
Source: PubMed Central journal article supplement — Proc Natl Acad Sci U S A. 2021 Feb 11;118(9):e2020834118. doi: 10.1073/pnas.2020834118 (PMC7936333; doi:10.1073/pnas.2020834118), 2021-02-11
Supplement: pnas.2020834118.sapp.pdf [file pnas.2020834118.sapp.pdf]

1

## 2 **Supplementary Information for**

### 3 **The effects of school closures on SARS-CoV-2 among parents and teachers**

4 **Jonas Vlachos, Edvin Hertegård, Helena Svaleryd**

5 **Helena Svaleryd**

6 **E-mail: [helena.svaleryd@nek.uu.se](mailto:helena.svaleryd@nek.uu.se)**

#### 7 **This PDF file includes:**

- 8     Supplementary text
- 9     Figs. S1 to S8 (not allowed for Brief Reports)
- 10    Tables S1 to S11 (not allowed for Brief Reports)
- 11    SI References

## 12 Supporting Information Text

13 **The development of the pandemic and non-pharmaceutical interventions.** The first case of SARS-CoV-2 in Sweden was reported on  
14 January 31, 2020, and the disease was classified as a danger to public health and to society on the following day (1). Among other things,  
15 this classification means that all documented cases of active infection have to be reported to the Public Health Agency. The first death from  
16 COVID-19 occurred on March 11. The daily number of deaths increased rapidly and peaked in the first half of April whereafter the daily  
17 number of deaths declined gradually. By the end of the school year in mid-June, the 7-day average of daily deaths was around 30 and the  
18 cumulative number of deaths 5140 (51 per 100 000 inhabitants).

19 The hardest hit region in both absolute and relative terms was the Stockholm region with 2.4 million inhabitants. Stockholm recorded 2211  
20 deaths (93 per 100 000) and 16 275 cases (685 per 100 000) by mid-June. In deaths per 100 000 inhabitants, Stockholm was followed by  
21 Sörmland (79), Västmanland (55) and Dalarna (52). The second largest region of Sweden, Västra Götaland, had by June 15 reported 649  
22 deaths among its 1.7 million inhabitants. Testing scaled up faster in this region than in Stockholm and the total number of cases was 11 000.  
23 The region of Skåne with 1.4 million inhabitants was less affected and reported 16 deaths per 100 000 and a total of 2300 cases by mid-June.

24 The Swedish Public Health Agency introduced several measures to reduce the transmission of the virus (2). On March 10, a recommendation  
25 against unnecessary visits to care facilities was issued and on March 11 public gatherings of more than 500 people were banned. On March 13,  
26 people were recommended to stay at home when having symptoms of illness and those who could work from home were recommended to do  
27 so on March 17. On March 18, upper secondary schools and institutions of higher education moved to online instruction. On March 19, a  
28 recommendation against unnecessary travel was issued and on March 24, restaurants and bars were instructed to increase the distance between  
29 costumers. Public gatherings above 50 persons were banned on March 27 and visits to elderly care facilities were banned the following day.  
30 On April 1, stricter recommendations on social distancing for the public were issued. On June 13, the recommendation against unnecessary  
31 travel was lifted. Throughout the period, there was no official recommendation that those without symptoms should stay at home, even if the  
32 household was shared with individuals with confirmed SARS-CoV-2 infection.

33 Mobility both within and between Swedish regions declined substantially as a response to the pandemic and the recommendations issued by  
34 the authorities (3). The distance individuals moved from their homes during a day was substantially reduced and the decline in mobility was  
35 similar for residents in areas with different socioeconomic and demographic characteristics (visible minorities, highly educated, poor, and  
36 being 70 years or older) (4).

37 **Swedish schools during the pandemic.** Compulsory schools (age 7–16) were kept open for instruction and to reduce transmission the  
38 following precautionary measures were recommended (5): enhanced facilities for hand washing and disinfection; posters encouraging hand  
39 washing; increased distance in classrooms and dining halls, if possible; avoidance of large gatherings, as far as possible; minimize activities  
40 like open houses and parental meetings; increased outdoor activities, if possible; avoidance of close contacts between staff and students and  
41 between students; enhanced cleaning of heavily exposed areas and keyboards/tablets. Compared to school opening policies in other countries,  
42 the precautionary measures in Sweden are best described as mild (6). In particular, there is no mandated quarantine of those exposed who do  
43 not show symptoms, no imposed reductions of class size and no recommendations concerning the use of face masks.

44 On March 18, upper secondary schools and institutions of higher education moved to online instruction. Upper secondary schools thus  
45 closed for normal instructions just as the number of deaths and ICU admissions began to increase (see Fig. 1 in the main text). Although  
46 upper secondary school moved to online teaching, some teachers were still teaching online from the school premises. According to a survey  
47 conducted by a large teachers' union during the last week of April and first week of May, 21 percent taught from the school, 46 percent partly  
48 from home, and 33 percent only from home (7). As expected, compulsory school teachers mainly taught from school; 2 percent of the teachers  
49 in compulsory schools had been partly teaching online from home and 1 percent had only been teaching from home. There have also been  
50 media reports of substantial student absenteeism in compulsory schools. Again there are no official reports but according to the same survey,  
51 18 percent of compulsory students were absent on a typical day. In a survey of 27 compulsory schools conducted by the National Board of  
52 Education during late April, 7 schools reported that absenteeism among compulsory school students was about normal, 13 that there was an  
53 increase in absenteeism of between 20 and 50 percent, and 7 stated an increase of more than 50 percent (8). The conclusion drawn from this  
54 survey is that student absenteeism increased, but not dramatically so.

55 **Data and sample restrictions.** The sample of parents is constructed as follows. We define household adults who are exposed to their own  
56 children (biological or adopted) or a new partner's children from a previous relationship as parents. For separated parents, we use the household  
57 identifier in LISA to identify any current partner. This enables us to identify new couples who are either married or have common children.  
58 Households consisting of unmarried cohabitant couples without common children cannot be identified and will be categorized as single  
59 households. The study population consists of parents who have children in school years 7–12 in the household, or biological children in these  
60 school years living in the same region. Because parents are less likely to interact regularly with children living at a distance, only children  
61 residing in the same region are considered in the analysis. There are 21 regions in Sweden and they are thus relatively large geographical areas.  
62 There were also recommendations against leaving the region of residence during most of the spring 2020.

63 We sort parents by the age of the youngest child connected to the parents in the household or through biological links. Parents are considered  
64 exposed to lower secondary schools if their youngest child is enrolled in school years 7–9. Unexposed parents are defined by their youngest  
65 child being enrolled in upper secondary school. In the analysis we focus on parents with the youngest child in school years 9 and 10 since they  
66 are likely to be the most similar in other aspects, except for parents with their youngest child in the 9th school year being exposed to an open  
67 school. We further exclude those born outside of Sweden, the Nordics, and the EU. After this restriction, the main sample consists of 166 630  
68 parents connected to school years 9 and 10. 480 291 parents are connected to school years 7 through 12.

69 The teacher sample consists of teachers working in lower and upper secondary schools according to the Teacher Register. Teachers with  
70 children born in 2019 are excluded as they are likely to be on parental leave during the spring of 2020. We also exclude those recorded as being

71 on leave of absence during the fall of 2019. The final sample consists of 72 946 lower and upper secondary teachers. In a descriptive analysis  
72 we include lower and upper primary school teachers (school years 1–6) identified in the Teacher Register. When including these, the teacher  
73 sample consists of 137 213 individuals. For the sample of partners to lower and upper secondary teachers, we connect partners to teachers  
74 using the household identifier from LISA. This enables us to identify partners who are either married to or have common children with the  
75 teacher. The resulting sample consists of 47 383 partners.

76 Our main outcome variable is positive PCR tests reported to the Public Health Agency but we also analyze the incidence of COVID-19  
77 diagnoses from healthcare visits and severe cases of COVID-19 (hospitalizations and deaths) reported to the National Board of Health and  
78 Welfare. The first case of SARS-CoV-2 in Sweden was reported on January 31, 2020, and the disease was classified as a danger to public  
79 health and to society on the following day (1). Among other things, this classification means that all documented cases of active infection have  
80 to be reported to the Public Health Agency. Testing capacity was slow to expand and from March 13 (week 11), testing was directed towards  
81 healthcare employees and individuals with symptoms of COVID-19 in need of healthcare. As shown in Fig. S1, testing increased substantially  
82 from early June (week 23). Healthcare is the responsibility of Sweden's 21 healthcare regions as is testing for SARS-CoV-2. Thus, there are  
83 regional differences in testing capacity as well as rules and recommendation regarding testing. Some regions have recommended not to test  
84 children under 16 (for example Västra Götaland and Uppsala) and some have not had any age restrictions (for example Skåne). The number of  
85 detected cases does therefore not well reflect the actual rate of infections and the rate of positive tests remained high throughout June (week  
86 27). By June 15, a total of 383 000 PCR tests had been performed (3 800 per 100 000 inhabitants) (9).

87 **Covariate balance.** For estimation of the causal effect on parents the identification strategy hinges on the similarity of parents with their  
88 youngest child in school years 9 and 10. Apart from a 1-year age difference, these groups should be balanced on covariates in order to be valid  
89 counterfactuals. We test this assumption by showing balancing tests where we first use OLS to linearly predict the incidence of SARS-CoV-2  
90 using the observable covariates (apart from age group effects) of parents with the youngest child in school years 7–12. Using this prediction as  
91 the dependent variable, we next run an OLS regression using only indicator variables for school year of the youngest child in the family (school  
92 year 10 is the reference category). Fig. S2 shows the estimates from this second regression for the main sample of parents. The corresponding  
93 balancing test when non-EU migrants are included is shown in Fig. S3. The specified regressions equations are shown below. The outcome  
94 variable is actual infections (regression [1]) or predicted infections (regression [2]), and  $\mathbf{X}$  is a vector capturing spouse's occupation, missing  
95 information for spouse, educational level, municipality of residence, log disposable family income, zero income, region of origin of birth,  
96 and sex.  $year_{i,g}$  are indicator variables capturing the school year of the youngest child in the household. Equation [1] shows the regression  
97 equation used to estimate the predicted infections, which is subsequently used as the dependent variable in the balancing equation [2].

$$y_i = \beta_0 + \mathbf{X}'\gamma + \varepsilon_i \quad [1]$$

$$y_{i,predict} = \beta_0 + \sum_{\substack{g=7 \\ g \neq 10}}^{12} year_{i,g} + \varepsilon_i \quad [2]$$

98 In order to judge the importance of covariates, odds ratios without controlling for covariates are shown in Fig. S4. Panels S4a and S4b show  
99 odds ratios when only controlling for age group effects and panels S4c and S4d show odds ratios without any controls. Odds ratios with  
100 covariates for the main sample of parents are shown in panel a) of Fig. S5 and panel b) shows results when including all parents. The OLS  
101 estimates for both samples of parents, with all covariates and only age group effects and sex, are shown in Table S3. Table S3 also shows  
102 estimates for teachers and teachers' partners, with the full set of covariates and only age group effects and sex. Age groups are included since  
103 the parental sample is imbalanced on age by construction and sex is included since there are more female teachers in lower secondary school.  
104 In the parental sample, which is roughly balanced on sex, the incidence of positive tests among women is 9.47 cases/1000 and among men 5.77  
105 cases/1000. This difference may be due to educational, occupational or potential sex differences in testing or prevalence of COVID-19.

106 **Results including primary school teachers.** We extend the population of teachers at open schools to include lower (school years 1–3) and  
107 upper (school years 4–6) primary school teachers. Results for confirmed PCR-tests and COVID-19 diagnoses when controlling for covariates  
108 are shown in Table S2.

109 **Additional results and robustness tests.** The propensity to get tested for SARS-CoV-2 could be affected by being connected to open and  
110 closed schools, regardless of health status. This is less of a concern for COVID-19 diagnoses made by the healthcare sector, especially severe  
111 cases which require hospital care or cause death. Results for severe cases, defined as admittance to hospital or death due to COVID-19, are  
112 presented for all groups in Table S1.

113 Some lower secondary schools spontaneously moved to online instruction and may thus be classified as having on-site instruction when they  
114 in fact conducted the teaching online. No official records on such closures exist but media searches reveal that they were rare and short-lived  
115 (see below). Privately managed independent lower secondary schools are over-represented in reports on proactive closures and we therefore  
116 exclude such schools as a robustness test. Students attending independent schools are generally from a more advantaged socioeconomic  
117 background and excluding them introduces imbalance to the sample of parents (Fig. S6). OLS estimates excluding independent lower  
118 secondary schools for parents are shown in Table S4. Corresponding results for teachers and their partners are shown in Table S5.

119 Upper secondary schools were allowed to let small groups of students complete practical elements of education and assignments, provided  
120 that this could be done safely (10). Such practices may have been more common at vocational programs and as a robustness test we exclude  
121 parents exposed to such upper secondary programs. This amounts to excluding parents of relatively disadvantaged socioeconomic background,  
122 which means that the exclusion introduces imbalance among parents (Fig. S6). OLS estimates imposing this exclusion are shown in Table S4.

123 The baseline specifications controls for the occupation of teachers' partners. As a robustness test, we instead drop the teachers and partners  
124 who are exposed to the healthcare sector through the partners' occupation (occupational codes 15, 22, 32 and 53). The results are shown in  
125 Table S5.

126 We use an alternative measure of exposure to lower secondary school for parents. Parents are then defined as exposed if they have a child in  
127 the household, or a child residing in the same region, in lower secondary school. Families with children too old to be in secondary school are  
128 dropped, as are families whose youngest child attends school below year 7. We control for having a child in school years 11 and 12 and the  
129 results presented in Table S4 thus shows the impact of being exposed to a child in lower secondary school compared to being exposed to a child  
130 in upper secondary school year 10. Table S4 also shows results where we pool parents with the youngest child in school years 8–11 and 7–12.

131 Household size tends to decrease in student age and Table S6 shows results for parents when controlling for this variable. Table S7 presents  
132 the sensitivity to using the cut-off dates March 25 and April 16 for parents, teachers and teachers' partners.

133 **Heterogeneity analysis.** The expected impact of school closures on virus transmission depends mainly on the magnitude of contact reduction.  
134 Two factors that may be of importance for the effect is population density and how widely spread the virus was prior to schools closing. A  
135 study of US districts show that transmission of SARS-CoV-2 increases with population density (11). To investigate this matter we implement a  
136 heterogeneity analysis by district population density, categorizing districts with a population density above the 75th percentile as high density  
137 districts.

138 Timing has been shown to be important for the effectiveness of NPIs (12). We therefore investigate whether the impact of school closures  
139 depends on the level of virus transmission prior to school closure. Regions with above the populated weighted median spread of 12 cases per  
140 100 000 are categorized as high spread regions, i.e. the regions (cases per 100 000 in parenthesis): Stockholm (20), Uppsala (16), Östergötland  
141 (16), Skåne (16), Sörmland (13) and Jönköping (12).

142 The econometric model is modified by adding interaction terms between indicators for high population density, respective high initial  
143 contagion, and exposure to lower secondary school as well as interactions with all control variables except for the municipality indicators. The  
144 results are reported in Table S8.

145 **Distribution of cases across schools.** Although limited by the low testing rate, an illustration of the aggregation of cases across schools  
146 and over time can provide some evidence of the role of super-spreading events. To investigate whether there is substantial heterogeneity across  
147 schools, we aggregate cases across schools for parents and teachers, respectively. Cases among parents connected to a school through students  
148 in school years 7–12 are aggregated to the school level which means that cases among parents to several children are connected to more than  
149 one school. When excluding schools with less than 50 connected parents there are 1455 lower and 1149 upper secondary schools in the data.  
150 Among these schools, 25 percent of upper secondary and 32 percent of lower secondary schools had no cases. Since upper secondary schools  
151 on average are larger (397 connections compared to 312 for lower secondary schools) we mechanically expect more cases in upper secondary  
152 schools. Fig. S7 shows the fraction of total cases in lower respective upper secondary schools with one to 28 cases. For both types of schools, a  
153 majority of cases occurred at schools with few cases. To analyze how the cases are clustered over time, we aggregate the cases into episodes. If  
154 all cases within a school occur the same or adjacent week it is coded as one episode. If cases are more dispersed over time, the school is coded  
155 as having more than one episode of infection outbreaks. Fig. S8 displays the fraction of schools with at least two cases in total that have one or  
156 more than one episodes. The pattern is similar for lower and secondary schools, with about 60 percent of the schools having one outbreak  
157 episode and 40 percent having more than one episode.

158 We conduct the same analysis for teachers at schools with more than 5 teachers. As for the analysis of parents, there are no cases in a  
159 majority of schools (90 percent of lower secondary and 93 percent of upper secondary schools). Moreover, most cases are recorded in schools  
160 with only one case (Fig. S7). Among upper secondary schools there are no schools with more than two cases, whereas among lower secondary  
161 schools there are some schools with three or more cases. The main analysis shows that keeping lower secondary schools open resulted in  
162 approximately 100 additional cases among lower secondary school teachers. According the patterns of distribution presented here, about a  
163 third of these can be found in schools with many cases and two thirds in schools with only one case. Turning to the analysis of outbreak  
164 episodes there is some indication of more clustering of outbreaks among teachers in lower secondary than upper secondary schools (Fig. S8).

165 **Students.** We show descriptive results of infection rates for students by school year in Table S9. Due to the discussed age restrictions for  
166 testing and risk of differing behavior for students over 18, we show results for students below age 18 in school years 7–10. As with parents and  
167 teachers, we control for observable characteristics such as sex, region of origin, and mother and father log disposable income, occupation,  
168 region of origin, education, missing values, and number of siblings in different age groups. We restrict attention to students with parents born  
169 within the EU and Nordics due to balancing of covariates concerns.

170 **Media searches.** In order to get information on spontaneous closures of lower secondary schools, media searches were conducted using the  
171 service Mediearkivet/Retriver and on Sveriges Radio's web page (public service radio with substantial local presence). Search terms were  
172 permutations of "school closure" (skolstängning/skola stängd), "distance education" (distansundervisning), "online education" (onlineun-  
173 dervisning), "corona" and "covid". Results for individual schools were followed by web searches to find more information on each particular  
174 case. Spontaneous closures were recorded as proactive if they did not occur as a result of cases detected at the school and reactive otherwise.  
175 Provided that information is available, a closure is labelled as brief if the duration was less than a week.

176 In total, reports on 40 closures were found (27 among privately managed independent schools). 29 of these were proactive (22 among  
177 independent schools) while 11 were reactive (5 among independent schools). Spontaneous closures thus appear to have been rare and  
178 independent schools are vastly over-represented among those that closed proactively. Two of the reactive closures were on advice from the  
179 local disease protection officer and they both occurred late in the school year (June 6 and 8). Information on the duration was usually not  
180 available, but of the 18 reports from which the duration can be judged, 12 were brief. Several of the closures were also partial, meaning that

181 school days were cut short, rolling schedules introduced, or that instruction partially moved online. Details on each specific report are available  
182 from the authors.

183 **Cases, deaths and the case fatality rate.** To extrapolate the expected effect of school closure on the number of deaths in Sweden we derive  
184 the case fatality ratio (CFR) for different age groups. CFR is calculated by dividing the number of deaths with the number of cases and hence  
185 crucially depend on the testing regime. Table [S10](#) shows the incidence of detected SARS-CoV-2 in different age groups until June 15, 2020,  
186 and the number of deaths among these cases reported until July 25. The numbers are shown both including and excluding healthcare workers,  
187 for which testing was more accessible. The CFR increases with age, except for the higher value for the youngest age group due to one dead  
188 child. This child was younger than one years old and thus not directly exposed to schools. The average age among teachers is 48, their partners  
189 49 and parents 50 years old. Based on the CFR distribution in Table [S10](#) we calculate the expected effect on mortality among lower secondary  
190 parents using a CFR of 1.1 percent.

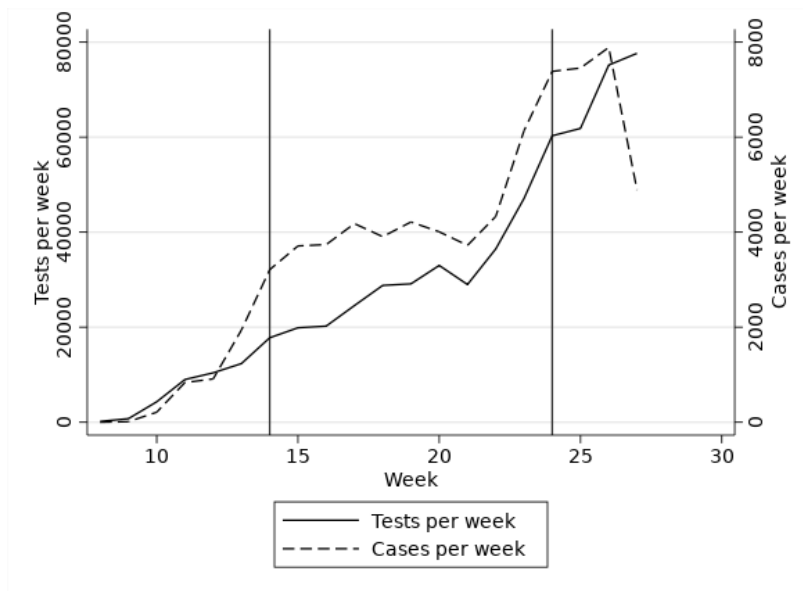

**Fig. S1.** Tests and cases per week. Weekly number of PCR tests and positive cases. Vertical lines indicate weeks 14 and 24, the approximate period of analysis. Data from the Public Health Agency (9).

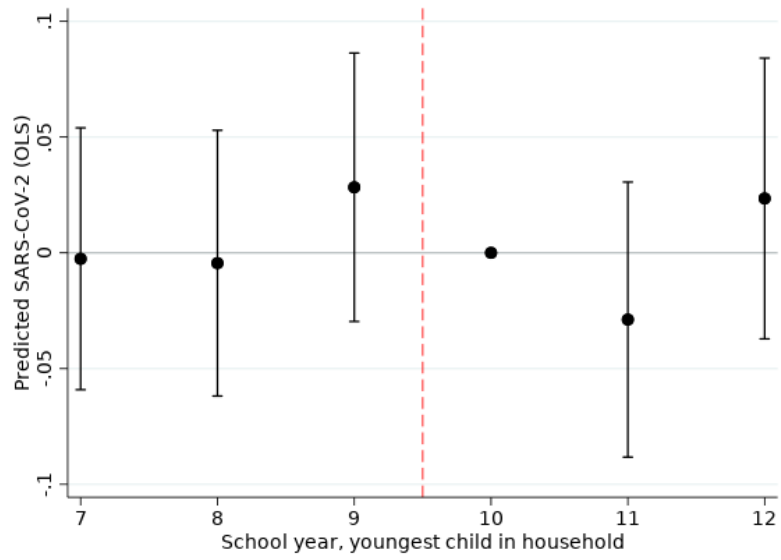

**Fig. S2.** Covariate balance, main sample. Predicted SARS-CoV-2 regressed on school year of the youngest child in the household for parents born within EU and Nordics. Predicted outcome using sex, occupation, educational attainment, income, regions of residence and of origin for parents. The reference category is school year 10 and 95% confidence intervals are indicated.

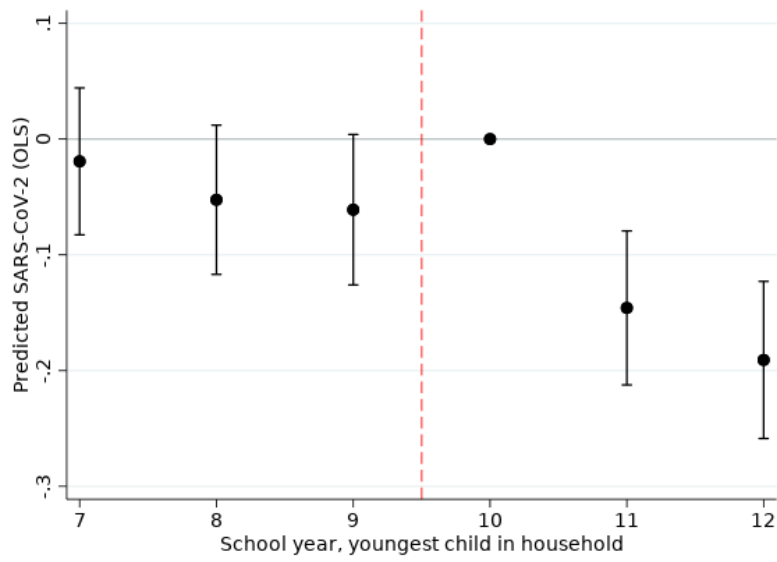

**Fig. S3.** Covariate balance, all parents (including non-EU migrants). Predicted SARS-CoV-2 regressed on school year of the youngest child in the household for all parents. Predicted outcome using sex, occupation, educational attainment, income, regions of residence and of origin for parents. The reference category is school year 10 and 95% confidence intervals are indicated.



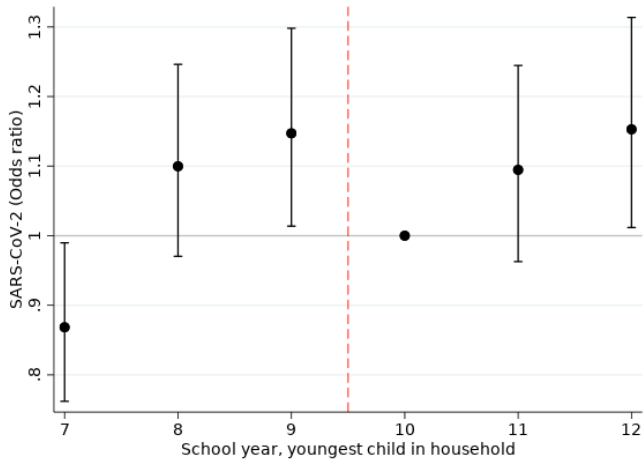

(a) Age group controls - Parents born within EU and the Nordics

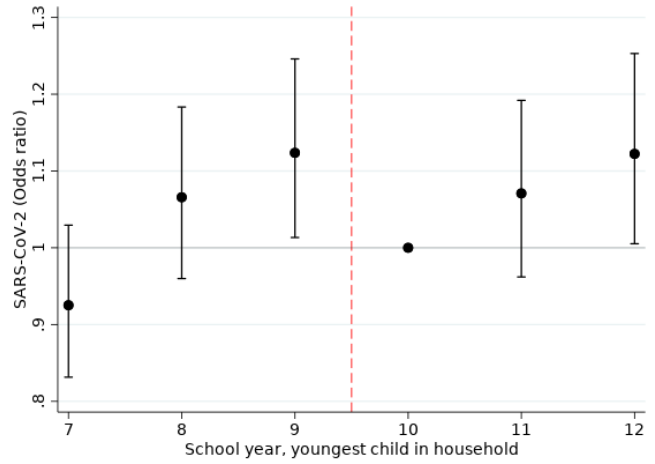

(b) Age group controls - All parents

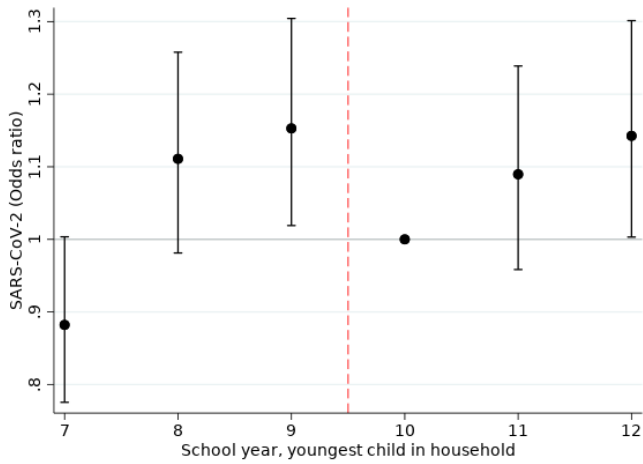

(c) Excl. all controls - Parents born within EU and the Nordics

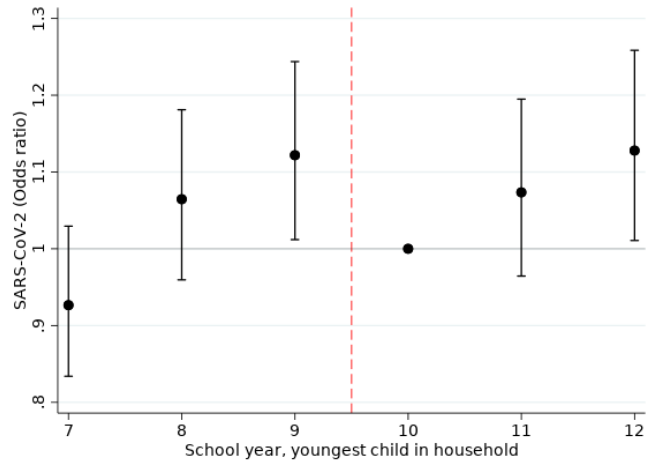

(d) Excl. all controls - All parents

**Fig. S4.** Results excluding covariates. SARS-CoV-2 odds ratios for parents by school year of the youngest child in the household excluding all control variables (except for age group effects in Panel S4a and S4b and  $y_{prior}$ ). Odds ratios estimated using logistic regression. The reference category is school year 10 and 95% confidence intervals are indicated. Fig. S4a and Fig. S4c show outcomes for parents born within the EU and the Nordics, which is our main study population. Fig. S4b and Fig. S4d show outcomes including all parents.

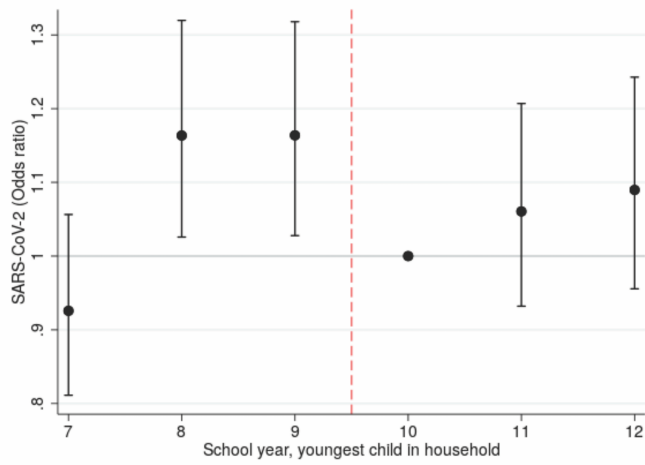

(a) Parents born within EU and the Nordics

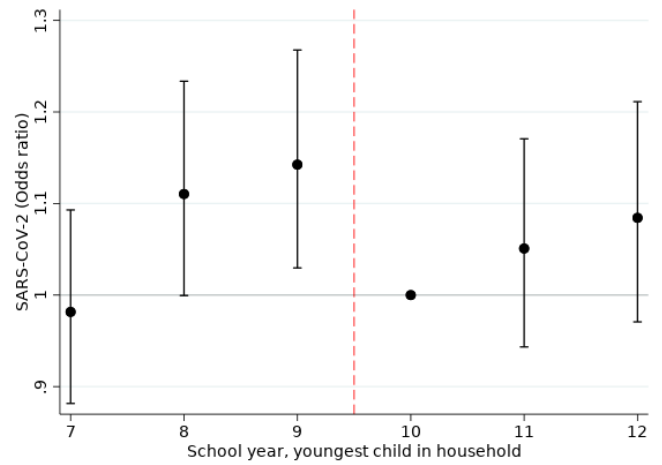

(b) All parents

**Fig. S5.** Results including covariates. SARS-CoV-2 odds ratios for parents by school year of the youngest child in the household. Odds ratios estimated using logistic regression. The reference category is school year 10 and 95% confidence intervals are indicated. Fig. S5a shows outcomes including parents born within the EU and the Nordics, which is our main study population. Fig. S5b shows outcomes including all parents.

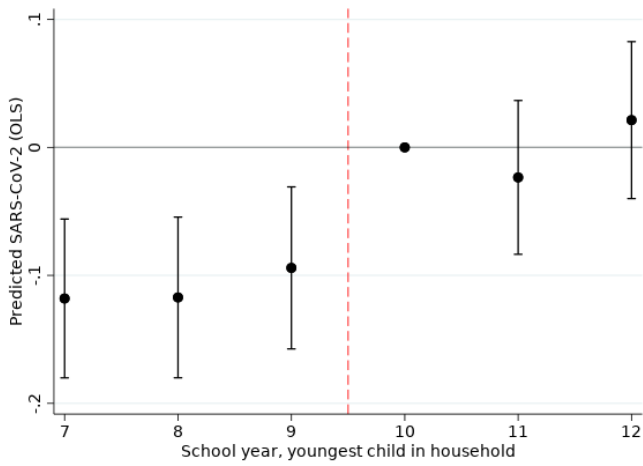

(a) Predicted outcome - Excl. private indep. schools

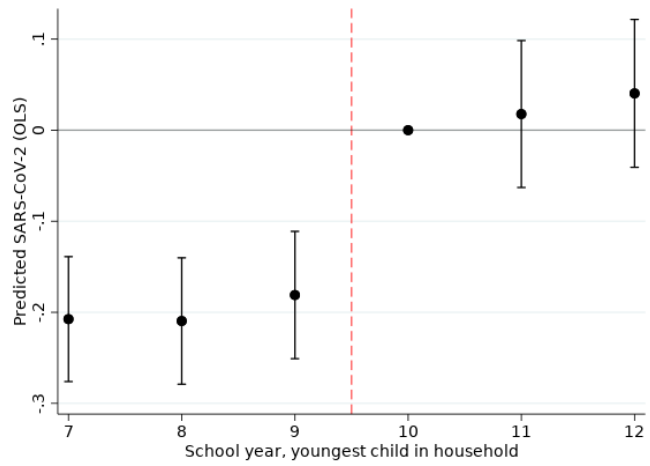

(b) Predicted outcome - Excl. vocational program links

**Fig. S6.** Covariate balance for subsamples. Predicted SARS-CoV-2 regressed on school year of the youngest child in the household for parents born within EU and the Nordics, excluding private independent schools and vocational program links separately. Predicted outcome using sex, occupation, educational attainment, income, regions of residence and of origin for parents. The reference category is school year 10 and 95% confidence intervals are indicated. Fig. S6a shows outcomes excluding private independent school links. Fig. S6b excludes vocational program links.

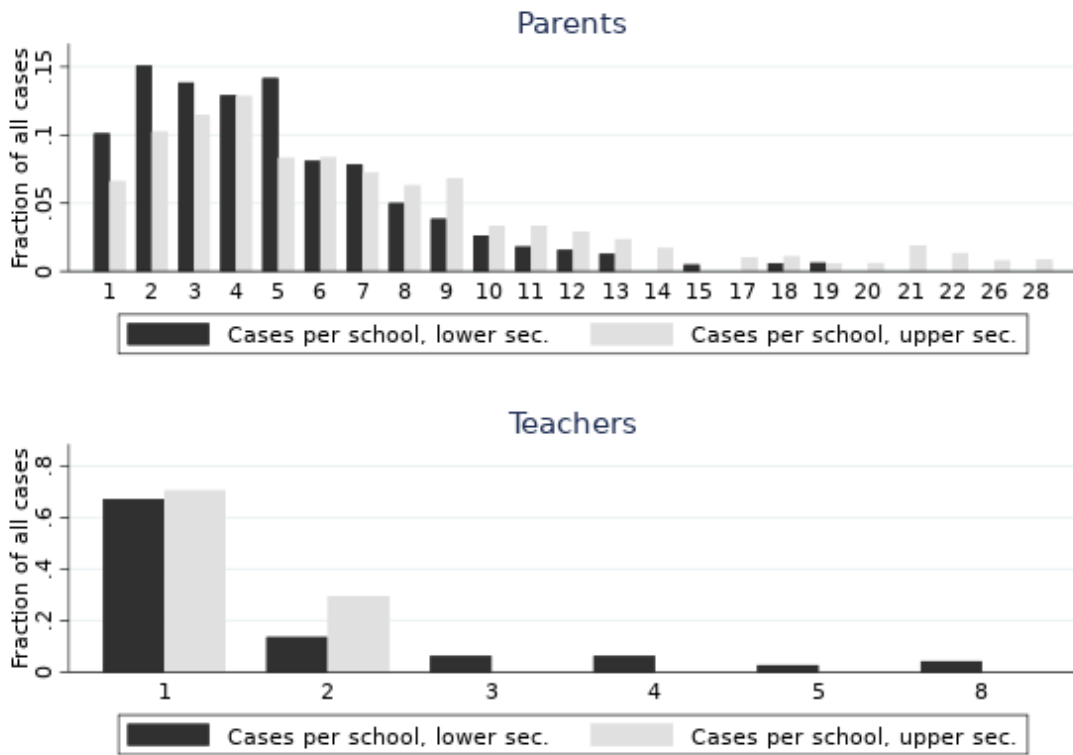

Fig. S7. Distribution of cases across schools. The figure shows the fraction of total cases at schools with 1 to 28 cases.

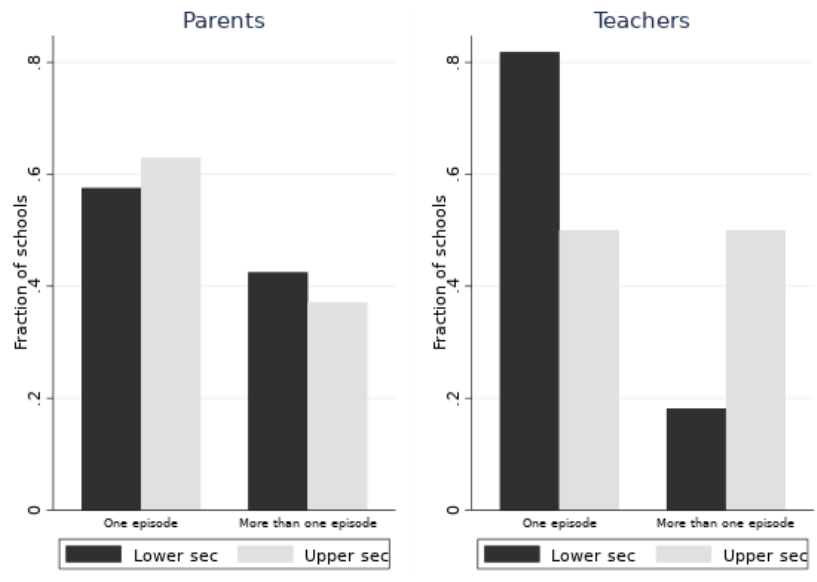

**Fig. S8.** Episodes of cases within schools. The figure shows the fraction of schools with at least two cases which had all cases in one week or adjacent weeks and the fraction of schools with cases at least one week apart.

**Table S1. Impact of exposure to open schools on PCR tests and severe COVID-19 diagnoses**

|                | Parents               |                     | Teachers               |                        | Teachers' partners   |                     |
|----------------|-----------------------|---------------------|------------------------|------------------------|----------------------|---------------------|
|                | OLS (cases/1000)      |                     |                        |                        |                      |                     |
|                | PCR                   | Severe cases        | PCR                    | Severe cases           | PCR                  | Severe cases        |
| Open school    | 1.05**<br>(0.43)      | -0.21<br>(0.18)     | 2.81***<br>(0.59)      | 0.84***<br>(0.28)      | 1.47**<br>(0.71)     | 0.08<br>(0.31)      |
| Mean dep. var. | 6.37                  | 1.40                | 2.96                   | 0.96                   | 5.10                 | 1.01                |
| Obs.           | 166,630               | 166,719             | 72,946                 | 72,976                 | 47,383               | 47,413              |
|                | Logit (odds ratios)   |                     |                        |                        |                      |                     |
|                | PCR                   | Severe cases        | PCR                    | Severe cases           | PCR                  | Severe cases        |
|                | 1.17**<br>[1.03,1.32] | 0.84<br>[0.64,1.11] | 2.01***<br>[1.52,2.67] | 2.15***<br>[1.41,3.29] | 1.29*<br>[1.00,1.67] | 1.09<br>[0.62,1.92] |
| Obs.           | 163,195               | 150,571             | 70,151                 | 62,249                 | 44,025               | 34,563              |

Note: \*\*\* $p < 0.01$ , \*\* $p < 0.05$ , \* $p < 0.1$ . Standard errors in parenthesis clustered the at the household level for parents and school level for teachers and partners. "Open school" indicates exposure to lower-secondary schools. Severe cases include COVID-diagnoses registered at hospital or as death. The effects are estimated using linear probability models (OLS) and logistic regressions (Logit).

**Table S2. SARS-CoV-2 among lower primary, upper primary, and lower secondary teachers relative to upper secondary teachers (OLS)**

|                 | PCR               | Healthcare        |
|-----------------|-------------------|-------------------|
| Lower primary   | 1.66***<br>(0.53) | 0.70**<br>(0.34)  |
| Upper primary   | 2.19***<br>(0.54) | 1.24***<br>(0.37) |
| Lower secondary | 2.85***<br>(0.59) | 1.44***<br>(0.35) |
| Mean dep. var.  | 2.96              | 1.61              |
| Obs.            | 137,213           | 137,272           |

Note: \*\*\* $p < 0.01$ , \*\* $p < 0.05$ , \* $p < 0.1$ . Standard errors in parenthesis are clustered at the school level for teachers. Upper secondary teachers are used as the reference category. All covariates included. The results are estimated using linear probability models (OLS).

**Table S3. Main results for parents, teachers & partners - when including and excluding controls. Outcome: Positive PCR tests per 1000**

|                | Parents (main)   |                  | Parents (all)     |                  | Teachers          |                   | Partners         |                  |
|----------------|------------------|------------------|-------------------|------------------|-------------------|-------------------|------------------|------------------|
|                | Controls         | Excl. controls   | Controls          | Excl. controls   | Controls          | Excl. controls    | Controls         | Excl. controls   |
| Open school    | 1.05**<br>(0.43) | 1.01**<br>(0.43) | 1.09***<br>(0.42) | 1.02**<br>(0.42) | 2.81***<br>(0.59) | 2.94***<br>(0.58) | 1.47**<br>(0.71) | 1.58**<br>(0.71) |
| Mean dep. var. | 6.37             | 6.37             | 7.58              | 7.58             | 2.96              | 2.96              | 5.10             | 5.10             |
| Obs.           | 166,630          | 166,630          | 205,843           | 205,843          | 72,946            | 72,946            | 47,383           | 47,383           |

Note: \*\*\* $p < 0.01$ , \*\* $p < 0.05$ , \* $p < 0.1$ . Standard errors in parenthesis are clustered at the household level for parents and school level for teachers and partners. "Open school" is defined as exposure to lower secondary school. "Excl. controls" indicates a regression without covariates except for age group effects and sex. The results are estimated using linear probability models (OLS).



**Table S4. Robustness tests for parents. Outcome: Positive PCR tests per 1000.**

|               | No indep.         | No voc.        | Alt. exposure     | Pooling 7–12   | Pooling 8–11     |
|---------------|-------------------|----------------|-------------------|----------------|------------------|
| Open school   | 1.33***<br>(0.46) | 0.64<br>(0.53) |                   |                |                  |
| Open school*  |                   |                | 0.98***<br>(0.34) | 0.20<br>(0.26) | 0.79**<br>(0.31) |
| Mean dep. var | 7.15              | 7.50           | 6.73              | 7.56           | 7.31             |
| Obs.          | 150,326           | 124,527        | 327,209           | 480,291        | 322,446          |

Note: \*\*\* $p < 0.01$ , \*\* $p < 0.05$ , \* $p < 0.1$ . Standard errors in parenthesis clustered at the household level. “Open school” is defined as having the youngest child in school year 9 relative to school year 10. “Open school\*” is an indicator for living in a household with a child in lower secondary school (see online supplement for details on sample restriction). In “Alt. exposure” we an alternative measure of exposure, and control for having a child in year 11 or 12. The results are estimated using linear probability models (OLS).

**Table S5. Robustness checks for teachers and teachers' partners. Outcome: Positive PCR tests per 1000**

|                | Teachers             |                             | Teachers' partners   |                  |
|----------------|----------------------|-----------------------------|----------------------|------------------|
|                | Excl. indep. schools | Excl. partner in healthcare | Excl. indep. schools | Excl. healthcare |
| Open school    | 2.63***<br>(0.63)    | 2.76***<br>(0.59)           | 1.64**<br>(0.77)     | 1.57**<br>(0.64) |
| Mean dep. var. | 2.96                 | 2.83                        | 5.10                 | 2.78             |
| Obs.           | 65,119               | 66,828                      | 42,656               | 41,363           |

Note: \*\*\* $p < 0.01$ , \*\* $p < 0.05$ , \* $p < 0.1$ . Standard errors in parenthesis clustered the at the school level. "Open school" is defined as being a teacher or a teachers' partner at the lower secondary level. The results are estimated using linear probability models (OLS).

**Table S6. Parents - Controlling for household size**

|                | OLS              |                 | Logit            |                |
|----------------|------------------|-----------------|------------------|----------------|
|                | PCR              | Healthcare      | PCR              | Healthcare     |
| Open school    | 1.04**<br>(0.43) | -0.18<br>(0.26) | 1.17**<br>(0.07) | 0.93<br>(0.09) |
| Mean dep. var. | 6.37             | 2.74            |                  |                |
| Obs.           | 166,630          | 166,719         | 163,195          | 163,155        |

Note: \*\*\* $p < 0.01$ , \*\* $p < 0.05$ , \* $p < 0.1$ . Standard errors in parenthesis clustered the at the household level. "Open school" is defined as having the youngest child in school year 9 relative to school year 10. The results are estimated using linear probability models (OLS) and logistic regressions (Logit).

**Table S7. Robustness check - different cutoff dates for the pre-period. Outcome: Positive PCR tests per 1000**

|                | Parents                |                       | Teachers               |                        | Teachers' partners   |                      |
|----------------|------------------------|-----------------------|------------------------|------------------------|----------------------|----------------------|
|                | March 25               | April 16              | March 25               | April 16               | March 25             | April 16             |
|                | OLS (cases/1000)       |                       |                        |                        |                      |                      |
| Open school    | 1.16***<br>(0.43)      | 0.87**<br>(0.40)      | 2.81***<br>(0.59)      | 2.44***<br>(0.55)      | 1.43**<br>(0.73)     | 1.37**<br>(0.69)     |
| Mean dep. var. | 6.54                   | 5.74                  | 2.96                   | 2.66                   | 5.32                 | 4.59                 |
| Obs.           | 166,630                | 166,630               | 72,946                 | 72,946                 | 47,383               | 47,383               |
|                | Logit (odds ratios)    |                       |                        |                        |                      |                      |
|                | March 25               | April 16              | March 25               | April 16               | March 25             | April 16             |
| Open school    | 1.18***<br>[1.04,1.33] | 1.16**<br>[1.01,1.32] | 2.01***<br>[1.52,2.67] | 1.96***<br>[1.46,2.64] | 1.27*<br>[0.99,1.64] | 1.30*<br>[0.99,1.71] |
| Obs.           | 163,233                | 162,491               | 70,151                 | 69,732                 | 44,035               | 42,948               |

Note: \*\*\* $p < 0.01$ , \*\* $p < 0.05$ , \* $p < 0.1$ . Standard errors in parenthesis are clustered at the school level for teachers and their partners, at the household level for parents. "March 25" refers to moving the start of the investigation period to that date. Similarly, "April 16" moves the date to April 16. "Open school" is defined as having the youngest child in school year 9 relative to school year 10. The results are estimated using linear probability models (OLS) and logistic regressions (Logit).

**Table S8. Heterogeneous treatment for teachers, teachers' partners, and parents. Outcome: Positive PCR tests per 1000**

|                                          | Parents          |                | Teachers          |                   | Teachers' partners |                |
|------------------------------------------|------------------|----------------|-------------------|-------------------|--------------------|----------------|
| Open school                              | 1.07**<br>(0.46) | 0.72<br>(0.63) | 3.05***<br>(0.68) | 2.86***<br>(0.89) | 1.83**<br>(0.77)   | 1.03<br>(1.01) |
| Densely populated district × Open school | 0.09<br>(1.17)   |                | -0.94<br>(1.28)   |                   | -1.50<br>(1.92)    |                |
| High pre-closure spread × Open school    |                  | 0.71<br>(0.85) |                   | -0.07<br>(1.17)   |                    | 1.00<br>(1.44) |
| Mean dep. var.                           | 6.37             | 6.37           | 2.96              | 2.96              | 5.10               | 5.10           |
| Obs.                                     | 166,425          | 166,425        | 72,942            | 72,946            | 47,383             | 47,383         |

Note: \*\*\* $p < 0.01$ , \*\* $p < 0.05$ , \* $p < 0.1$ . Standard errors in parenthesis are clustered at the school level for teachers and their partners, at the household level for parents. "Open school" is defined as having the youngest child in school year 9 relative to school year 10. Densely populated districts are above the 75th percentile in the distribution of population density. High pre-closure spread is defined as above 12 detected cases per 100 000 inhabitants (Stockholm, Uppsala, Ostergotland, Skane, Sormland and Jonkoping). The results are estimated using linear probability models (OLS).

**Table S9. Students under age 18. Outcome: Positive PCR tests per 1000**

|                | OLS (cases/1000) | Logit (odds ratios) |
|----------------|------------------|---------------------|
| School year 7  | -0.08<br>(0.13)  | 0.86<br>[0.51,1.46] |
| School year 8  | -0.17<br>(0.13)  | 0.70<br>[0.40,1.22] |
| School year 9  | -0.07<br>(0.13)  | 0.89<br>[0.52,1.52] |
| Mean dep. var. | 0.53             |                     |
| Obs.           | 224,450          | 154,459             |

Note: \*\*\* $p < 0.01$ , \*\* $p < 0.05$ , \* $p < 0.1$ . Standard errors in parenthesis clustered at the school level. 95% confidence intervals in brackets are shown for the odds ratios. "School year ..." is in relation to school year 10 (reference category). The results are estimated using linear probability models (OLS) and logistic regressions (odds ratios).

**Table S10. COVID-19 cases, patients and deaths by age group**

| Age group | Cases | Cases<br>ex. health | Deaths | Deaths<br>ex. health | CFR (%) | CFR<br>ex. health | # patients<br>with diagnosis | # patients<br>in hospital |
|-----------|-------|---------------------|--------|----------------------|---------|-------------------|------------------------------|---------------------------|
| 0–6       | 152   | 152                 | 1      | 1                    | 0.66    | 0.66              | 132                          | 67                        |
| 7–16      | 457   | 457                 | 0      | 0                    | 0.00    | 0.00              | 230                          | 94                        |
| 17–19     | 614   | 611                 | 0      | 0                    | 0.00    | 0.00              | 230                          | 84                        |
| 20–29     | 5730  | 3204                | 7      | 7                    | 0.12    | 0.22              | 2114                         | 784                       |
| 30–39     | 7396  | 3544                | 13     | 11                   | 0.18    | 0.31              | 3185                         | 1456                      |
| 40–49     | 8586  | 4262                | 40     | 36                   | 0.47    | 0.84              | 3997                         | 1930                      |
| 50–59     | 9978  | 5241                | 134    | 122                  | 1.34    | 2.33              | 5275                         | 3216                      |
| 60–69     | 6463  | 4113                | 346    | 336                  | 5.35    | 8.17              | 4666                         | 3461                      |
| 70–79     | 4792  | 4671                | 1112   | 1102                 | 23.21   | 23.59             | 4756                         | 3902                      |
| 80–       | 9314  | 9301                | 3749   | 3741                 | 40.25   | 40.22             | 6050                         | 5151                      |
| Total     | 53482 | 35556               | 5402   | 5356                 | 10.10   | 15.06             | 30635                        | 21045                     |

Note: Test date until June 15, 2020. Deaths reported until July 25 for cases tested until June 15. "ex. health" means that healthcare and care workers are dropped (occupational codes 15, 22, 32, 53). CFR refers to the implied Case Fatality Rate.

**Table S11. Occupations ranked by incidence of positive PCR-tests (lowest to highest incidence)**

| Rank | Occupation title (SSYK3)                                                      | Cases/1000 | Occ. size |
|------|-------------------------------------------------------------------------------|------------|-----------|
| 1    | Specialists within environmental and health protection                        | 1.15       | 8690      |
| 2    | Mixed crop and animal breeders                                                | 1.15       | 7807      |
| 3    | Animal breeders and keepers                                                   | 1.37       | 15315     |
| 4    | Museum curators and librarians and related professionals                      | 1.56       | 10931     |
| 5    | Architects and surveyors                                                      | 1.72       | 12218     |
| 6    | Mathematicians, actuaries and statisticians                                   | 1.76       | 2267      |
| 7    | ICT architects, systems analysts and test managers                            | 1.93       | 127722    |
| 8    | Electronics and telecommunications installers and repairers                   | 1.96       | 10711     |
| 9    | Library and filing clerks                                                     | 1.98       | 3533      |
| 10   | Biologists, pharmacologists and specialists in agriculture and forestry       | 2.00       | 7006      |
| 11   | Sheet and structural metal workers, moulders and welders, and related workers | 2.08       | 25959     |
| 12   | University and higher education teachers                                      | 2.08       | 37457     |
| 13   | Designers                                                                     | 2.11       | 16579     |
| 14   | Wood processing and papermaking plant operators                               | 2.19       | 15986     |
| 15   | Ships' deck crews and related workers                                         | 2.22       | 1350      |
| 16   | Engineering professionals                                                     | 2.26       | 95496     |
| 17   | Market gardeners and crop growers                                             | 2.27       | 23319     |
| 18   | Other service related workers                                                 | 2.31       | 3892      |
| 19   | Marketing and public relations professionals                                  | 2.36       | 39061     |
| 20   | Metal processing and finishing plant operators                                | 2.37       | 16441     |
| 21   | Carpenters, bricklayers and construction workers                              | 2.44       | 106364    |
| 22   | Mobile plant operators                                                        | 2.46       | 35715     |
| 23   | Financial and accounting associate professionals                              | 2.49       | 57856     |
| 24   | Tax and related government associate professionals                            | 2.50       | 44063     |
| 25   | Recycling collectors                                                          | 2.55       | 8634      |
| 26   | Painters, Lacquerers, Chimney-sweepers and related trades workers             | 2.57       | 26114     |
| 27   | Research and development managers                                             | 2.58       | 6192      |
| 28   | Construction labourers                                                        | 2.59       | 6948      |
| 29   | Electrical equipment installers and repairers                                 | 2.60       | 38434     |
| 30   | ICT operations and user support technicians                                   | 2.61       | 44879     |
| 31   | Berry pickers and planters                                                    | 2.63       | 3045      |
| 32   | Physicists and chemists                                                       | 2.63       | 6462      |
| 33   | Forestry and related workers                                                  | 2.64       | 5690      |
| 34   | Creative and performing artists                                               | 2.64       | 12491     |
| 35   | Accountants, financial analysts and fund managers                             | 2.65       | 49484     |
| 36   | Culinary associate professionals                                              | 2.72       | 4046      |
| 37   | Broadcasting and audio-visual technicians                                     | 2.76       | 4350      |
| 38   | Other stationary plant and machine operators                                  | 2.76       | 7237      |
| 39   | Physical and engineering science technicians                                  | 2.77       | 104914    |
| 40   | Information, communication and public relations managers                      | 2.78       | 4313      |
| 41   | Legal professionals                                                           | 2.80       | 22498     |
| 42   | Roofers, floor layers, plumbers and pipefitters                               | 2.90       | 35526     |
| 43   | Commissioned armed forces officers                                            | 2.91       | 1032      |
| 44   | Postmen and postal facility workers                                           | 2.91       | 15781     |
| 45   | Precision-instrument makers and handicraft workers                            | 2.94       | 4762      |
| 46   | Client information clerks                                                     | 2.96       | 60517     |
| 47   | Production managers in manufacturing                                          | 2.98       | 16439     |
| 48   | Financial and insurance managers                                              | 3.00       | 4995      |
| 49   | Printing trades workers                                                       | 3.05       | 7542      |
| 50   | Insurance advisers, sales and purchasing agents                               | 3.06       | 132527    |
| 51   | Machine operators, textile, fur and leather products                          | 3.07       | 5538      |
| 52   | Ship and aircraft controllers and technicians                                 | 3.07       | 5535      |
| 53   | Real estate and head of administration manager                                | 3.08       | 3898      |
| 54   | Event seller and telemarketers                                                | 3.09       | 9073      |
| 55   | Armed forces occupations, other ranks                                         | 3.12       | 5448      |
| 56   | Information and communications technology service managers                    | 3.22       | 11185     |
| 57   | Blacksmiths, toolmakers and related trades workers                            | 3.22       | 49318     |
| 58   | Machinery mechanics and fitters                                               | 3.23       | 59063     |
| 59   | Upper secondary school teachers                                               | 3.24       | 32130     |
| 60   | Sports, leisure and wellness managers                                         | 3.26       | 1533      |
| 61   | Shop staff                                                                    | 3.27       | 194098    |
| 62   | Waiters and bartenders                                                        | 3.28       | 21963     |



|     |                                                                             |      |        |
|-----|-----------------------------------------------------------------------------|------|--------|
| 63  | Dockers and ground personnel                                                | 3.29 | 9415   |
| 64  | Production managers in construction and mining                              | 3.30 | 17554  |
| 65  | Finance managers                                                            | 3.36 | 17544  |
| 66  | Train operators and related workers                                         | 3.38 | 5626   |
| 67  | Supply, logistics and transport managers                                    | 3.39 | 11223  |
| 68  | Administrative and specialized secretaries                                  | 3.43 | 17491  |
| 69  | Wood treaters, cabinet-makers and related trades workers                    | 3.46 | 11287  |
| 70  | Stores and transport clerks                                                 | 3.54 | 93586  |
| 71  | Administration and planning managers                                        | 3.54 | 10438  |
| 72  | Sales and marketing managers                                                | 3.57 | 30809  |
| 73  | Photographers, interior decorators and entertainers                         | 3.59 | 9198   |
| 74  | Vocational education teachers                                               | 3.64 | 9888   |
| 75  | Authors, journalists and linguists                                          | 3.67 | 16615  |
| 76  | Machine operators, rubber, plastic and paper products                       | 3.67 | 13342  |
| 77  | Business services agents                                                    | 3.69 | 32825  |
| 78  | Process control technicians                                                 | 3.69 | 18686  |
| 79  | Elected representatives                                                     | 3.74 | 1070   |
| 80  | Machine operators, food and related products                                | 3.77 | 14866  |
| 81  | Organisation analysts, policy administrators and human resource specialists | 3.79 | 112865 |
| 82  | Lower primary school teachers                                               | 3.81 | 31992  |
| 83  | Assemblers                                                                  | 3.88 | 55141  |
| 84  | Cashiers and related clerks                                                 | 3.97 | 11339  |
| 85  | Athletes, fitness instructors and recreational workers                      | 3.98 | 26376  |
| 86  | Manufacturing labourers                                                     | 4.05 | 10383  |
| 87  | Hotel and conference managers                                               | 4.05 | 1483   |
| 88  | Construction and manufacturing supervisors                                  | 4.05 | 24431  |
| 89  | Other services managers not elsewhere classified                            | 4.08 | 7103   |
| 90  | Mining and mineral processing plant operators                               | 4.14 | 7980   |
| 91  | Butchers, bakers and food processors                                        | 4.14 | 8215   |
| 92  | Office assistants and other secretaries                                     | 4.16 | 168407 |
| 93  | Architectural and engineering managers                                      | 4.18 | 11232  |
| 94  | Croupiers, debt collectors and related workers                              | 4.22 | 2132   |
| 95  | Human resource managers                                                     | 4.27 | 8663   |
| 96  | Preschool managers                                                          | 4.28 | 4677   |
| 97  | Retail and wholesale trade managers                                         | 4.46 | 10304  |
| 98  | Cooks and cold-buffet managers                                              | 4.57 | 40728  |
| 99  | Heavy truck and bus drivers                                                 | 4.61 | 75333  |
| 100 | Administration and service managers not elsewhere classified                | 4.70 | 23612  |
| 101 | Childcare workers and teachers aides                                        | 4.70 | 124777 |
| 102 | Managing directors and chief executives                                     | 4.71 | 20381  |
| 103 | Teaching professionals not elsewhere classified                             | 4.75 | 36664  |
| 104 | Upper primary school teachers                                               | 4.82 | 29850  |
| 105 | Tailors, upholsterers and leather craftsmen                                 | 4.85 | 3298   |
| 106 | Primary and secondary schools and adult education managers                  | 4.93 | 10557  |
| 107 | Building caretakers and related workers                                     | 4.93 | 47028  |
| 108 | Cabin crew, guides and related workers                                      | 4.96 | 8469   |
| 109 | Religious professionals and deacons                                         | 4.98 | 3615   |
| 110 | Fast-food workers, food preparation assistants                              | 5.04 | 71276  |
| 111 | Newspaper distributors, janitors and other service workers                  | 5.12 | 41773  |
| 112 | Cleaners and helpers                                                        | 5.16 | 85416  |
| 113 | Other surveillance and security workers                                     | 5.46 | 36460  |
| 114 | Washers, window cleaners and other cleaning workers                         | 5.49 | 7835   |
| 115 | Legislators and senior officials                                            | 5.49 | 2915   |
| 116 | Hairdressers, beauty and body therapists                                    | 5.53 | 21344  |
| 117 | Restaurant managers                                                         | 5.64 | 8332   |
| 118 | Driving instructors and other instructors                                   | 5.8  | 7409   |
| 119 | Lower secondary school teachers                                             | 5.83 | 37894  |
| 120 | Social work and counselling professionals                                   | 6.69 | 46161  |
| 121 | Machine operators, chemical and pharmaceutical products                     | 6.9  | 5072   |
| 122 | Police officers                                                             | 8.08 | 16219  |
| 123 | Social work and religious associate professionals                           | 8.6  | 22084  |
| 124 | Education managers not elsewhere classified                                 | 8.85 | 1243   |
| 125 | Car, van and motorcycle drivers                                             | 9.03 | 19594  |

Note: Incidence (cases per 1000) of detected SARS-CoV-2 by 3-digit occupational codes (SSYK2012) until June 15, 2020. Ages 25–65, only occupations with at least 1000 employees reported. Healthcare occupations are excluded from the ranking. Teachers at different levels are identified using the Teacher Register and not by using SSKY codes 233 (compulsory school teachers) and 234 (upper secondary school teachers).

## References

1. Public Health Agency of Sweden, Confirmed cases - daily updates (2020) Available at: <https://www.arcgis.com/sharing/rest/content/items/b5e7488e117749c19881cce45db13f7e/data> [Accessed August 1, 2020].
2. Public Health Agency of Sweden, The Swedish strategy to combat COVID-19 (2020) Available at: <https://www.folkhalsomyndigheten.se/smittskydd-beredskap/utbrott/aktuella-utbrott/covid-19/folkhalsomyndighetens-arbete-med-covid-19/> [Accessed August 13, 2020].
3. Public Health Agency of Sweden, Weekly report about covid-19, week 20 (2020) Available at: <https://www.folkhalsomyndigheten.se/globalassets/statistik-uppfoljning/smittsamma-sjukdomar/veckorapporter-covid-19/2020/covid-19-veckorapport-vecka-20-final.pdf> [Accessed November 10, 2020].
4. M Dahlberg, et al., Effects of the COVID-19 Pandemic on Population Mobility under Mild Policies: Causal Evidence from Sweden. *arXiv* (2020).
5. Public Health Agency of Sweden, Suggestions for precautionary measures in preschool and compulsory school (2020) Available at: <https://www.folkhalsomyndigheten.se/smittskydd-beredskap/utbrott/aktuella-utbrott/covid-19/verksamheter/information-till-skola-och-forskola-om-den-nya-sjukdomen-covid-19/forebyggande-atgarder-i-for--och-grundskola/> [Accessed August 13, 2020].
6. BL Guthrie, et al., Summary of School Re-Opening Models and Implementation Approaches During the COVID 19 Pandemic (2020).
7. National Union of Teachers, Coronapandemin och undervisningens genomförande (2020).
8. Swedish National Agency for Education, Survey of absenteeism among teachers, children and pupils (2020) Available at: <https://www.skolverket.se/getFile?file=6654> [Accessed August 13, 2020].
9. Public Health Agency of Sweden, Weekly report about covid-19, week 30 (2020) Available at: <https://www.folkhalsomyndigheten.se/globalassets/statistik-uppfoljning/smittsamma-sjukdomar/veckorapporter-covid-19/2020/covid-19-veckorapport-vecka-30-final.pdf> [Accessed July 31, 2020].
10. Swedish National Agency for Education, Online teaching during the corona pandemic (2020) Available at: <https://www.skolverket.se/regler-och-ansvar/ansvar-i-skolfragor/distansundervisning> [Accessed July 31, 2020].
11. HM Korevaar, et al., Quantifying the impact of us state non-pharmaceutical interventions on covid-19 transmission. *medRxiv* (2020).
12. S Lai, et al., Effect of non-pharmaceutical interventions to contain COVID-19 in China. *Nature* (2020).
